# Supplementary material for: Differential Effects of Exercise on fMRI of the Midbrain Ascending Arousal Network Nuclei in Myalgic Encephalomyelitis / Chronic Fatigue Syndrome (ME/CFS) and Gulf War Illness (GWI) in a Model of Postexertional Malaise (PEM)
Source: Preprints.org preprint supplement (doi:10.20944/preprints202111.0420.v1), 2021-11-23
Supplement: Supplementary file 1 [file Appendix A. Raw Data.xlsx]

## Sheet: Raw data
								1	1	1	1	1	1	1	1	1	1	1	1	1	1		2	2	2	2	2	2	2	2	2	2	2	2	2	2		Δ = D2-D1	Δ = D2-D1	Δ = D2-D1	Δ = D2-D1	Δ = D2-D1	Δ = D2-D1	Δ = D2-D1	Δ = D2-D1	Δ = D2-D1	Δ = D2-D1	Δ = D2-D1	Δ = D2-D1
Age	male1_2female	PTSD	BMI	Dolorimetry_kg	1HC_2CFS_3GWI	1POTS_2START_3STOPP		DR_Day1	L_LC_Day1	L_MRF_Day1	L_PBC_Day1	L_PO_Day1	L_PTN_Day1	MR_Day1	PAG_Day1	R_LC_Day1	R_MRF_Day1	R_PBC_Day1	R_PO_Day1	R_PTN_Day1	VTA_Day1		DR_Day2	L_LC_Day2	L_MRF_Day2	L_PBC_Day2	L_PO_Day2	L_PTN_Day2	MR_Day2	PAG_Day2	R_LC_Day2	R_MRF_Day2	R_PBC_Day2	R_PO_Day2	R_PTN_Day2	VTA_Day2		DRΔ	L_LCΔ	L_MRFΔ	L_PBCΔ	L_POΔ	L_PTNΔ	MRΔ	PAGΔ	R_LCΔ	R_MRFΔ	R_PBCΔ	R_POΔ
41	1	1	33.4	5.76	1	1		0.42	0.75	0.56	0.91	0.55	0.63	0.4	0.42	0.09	0.7	0.22	0.16	0.65	0.4		0.57	0.72	0.48	0.29	0.59	0.29	0.66	0.44	0.91	0.73	0.72	0.73	0.69	0.39		0.15	-0.03	-0.08	-0.62	0.04	-0.34	0.26	0.02	0.82	0.03	0.5	0.57
20	2	0	23.4	4.46	1	1		0.06	0.16	-0.2	0.11	0.06	0.16	0.24	-0.11	0.34	-0.07	-0.02	-0.09	-0.01	0.03		-0.01	0.03	0.11	0.28	0.15	0.2	0.02	-0.11	-0.16	-0.22	-0.03	0.14	0.09	-0.04		-0.07	-0.13	0.31	0.17	0.09	0.04	-0.22	0	-0.5	-0.15	-0.01	0.23
20	2	0	21.7	8.3	1	1		0.05	0.05	0.35	0.17	-0.21	0.71	0.03	-0.1	-0.1	0.19	-0.26	0.1	0.28	0.56		-0.17	-0.5	-0.04	-0.45	-0.34	0.29	-0.19	-0.15	-0.42	-0.28	-0.21	-0.16	0.08	-0.1		-0.22	-0.55	-0.39	-0.62	-0.13	-0.42	-0.22	-0.05	-0.32	-0.47	0.05	-0.26
35	1	0	22	0.9	1	2		0.65	0.02	0.45	0.56	0.59	0.89	0.6	0.7	0.12	0.68	0.48	0.65	1.11	0.93		-0.01	0.11	0.23	0.38	0.03	0.14	0.07	-0.24	-0.04	-0.21	-0.21	-0.16	0.15	0.15		-0.66	0.09	-0.22	-0.18	-0.56	-0.75	-0.53	-0.94	-0.16	-0.89	-0.69	-0.81
63	1	0	33.9	5	1	2		0.32	0.41	0.63	0.45	0.35	0.31	0.33	0.19	0.21	-0.36	-0.23	0.29	0.53	0.27		0.64	1.03	0.41	0.65	0.84	0.85	0.68	0.64	0.16	0.67	0.31	0.47	0.89	0.47		0.32	0.62	-0.22	0.2	0.49	0.54	0.35	0.45	-0.05	1.03	0.54	0.18
19	1	0	31.6	3.9	1	2		0.02	0.16	0.13	0.2	0.19	-0.2	-0.07	-0.19	0.36	0.02	0.32	0.15	-0.18	0.05		0.5	0.59	-0.06	0.38	0.65	0.4	0.91	0.14	1.45	0.05	0.8	1.05	0.9	0.13		0.48	0.43	-0.19	0.18	0.46	0.6	0.98	0.33	1.09	0.03	0.48	0.9
19	1	0	30.2	6.7	1	2		0.14	0.3	-0.14	0.13	0.08	0.05	0.26	-0.08	0.33	-0.23	0.02	0.28	0.26	0.05		0.17	0.4	0.21	0.31	0.37	0.13	0.24	0.15	0.01	0.61	0.11	0.42	0.27	0.22		0.03	0.1	0.35	0.18	0.29	0.08	-0.02	0.23	-0.32	0.84	0.09	0.14
26	1	0	25.8	3.4	1	2		0.72	0.77	0.42	0.53	0.5	0.9	0.88	0.67	1.49	0.24	0.9	0.75	0.8	0.42		-0.04	-0.13	0.49	-0.11	-0.21	-0.08	-0.19	-0.01	-0.08	0.34	-0.08	-0.2	0.33	0.41		-0.76	-0.9	0.07	-0.64	-0.71	-0.98	-1.07	-0.68	-1.57	0.1	-0.98	-0.95
19	2	1	24.2	5.01	1	2		0.43	-0.05	0.71	0.69	0.25	0.7	0.22	0.81	-0.52	1.2	-0.03	0.17	0.56	0.63		0.07	-0.36	0.39	-0.04	0.09	-0.01	0.08	-0.01	-0.49	0.72	-0.39	0.15	0.27	0.19		-0.36	-0.31	-0.32	-0.73	-0.16	-0.71	-0.14	-0.82	0.03	-0.48	-0.36	-0.02
21	2	0	25.2	0.86	1	2		0.47	0.51	0.36	0.12	0.29	0.05	0.69	0.44	1.13	0.44	0.84	0.64	0.52	0.44		0.6	0.17	0.71	0.64	0.13	0.26	0.51	0.69	0.48	0.49	0.54	0.23	0.74	0.39		0.13	-0.34	0.35	0.52	-0.16	0.21	-0.18	0.25	-0.65	0.05	-0.3	-0.41
43	2	0	37.7	0.53	1	2		0.4	-0.19	0.5	0.33	0.39	0.19	0.23	0.65	0.09	0.91	0.39	0.4	0.78	0.47		0.35	0.21	0.91	0.32	0.11	0.31	0.25	0.61	0.34	0.37	0.16	0.26	0.04	0.34		-0.05	0.4	0.41	-0.01	-0.28	0.12	0.02	-0.04	0.25	-0.54	-0.23	-0.14
46	1	0	26.2	8.1	1	3		-0.18	-0.27	0.12	-0.3	-0.18	-0.05	-0.17	-0.27	-0.2	-0.16	-0.05	-0.2	-0.06	-0.04		0.23	0.38	0.05	0.31	0.3	0.34	0.28	0.08	0.76	-0.13	0.65	0.58	0.29	0.17		0.41	0.65	-0.07	0.61	0.48	0.39	0.45	0.35	0.96	0.03	0.7	0.78
45	1	0	30.6	6.1	1	3		0.55	0.63	0.3	0.63	0.6	0.81	0.55	0.51	0.67	0.59	0.76	0.66	0.68	0.53		0.76	0.4	0.68	0.44	0.33	0.98	0.53	0.88	0.54	1.21	0.54	0.52	0.82	0.76		0.21	-0.23	0.38	-0.19	-0.27	0.17	-0.02	0.37	-0.13	0.62	-0.22	-0.14
54	1	0	32.9	6.6	1	3		0.45	0.24	0.69	0.45	0.52	0.35	0.4	0.42	0.43	0.23	0.48	0.54	0.19	0.41		-0.33	-0.51	-0.18	-0.39	-0.36	-0.02	-0.33	-0.44	-0.35	-0.28	-0.21	-0.32	-0.06	-0.24		-0.78	-0.75	-0.87	-0.84	-0.88	-0.37	-0.73	-0.86	-0.78	-0.51	-0.69	-0.86
46	1	0	29.3	0.95	1	3		0.77	1.28	0.15	1.33	1.01	0.84	1.04	0.35	1.11	-0.24	1.12	1	0.71	0.45		0.71	0.79	1.07	1	0.72	0.56	0.74	0.54	0.88	0.89	1.13	1.03	0.81	0.69		-0.06	-0.49	0.92	-0.33	-0.29	-0.28	-0.3	0.19	-0.23	1.13	0.01	0.03
64	1	0	26.7	3.24	1	3		0.08	0.04	0.03	0.1	0.29	0.25	0.14	-0.02	0.1	0.13	0.06	0.19	0.13	0.05		0.25	0.32	0.51	0.05	0.29	0.15	0.23	0.3	0.59	0.42	0.35	0.51	0.52	0.29		0.17	0.28	0.48	-0.05	0	-0.1	0.09	0.32	0.49	0.29	0.29	0.32
64	1	0	27.7	1.71	1	3		-0.28	0.61	-0.76	0.28	0.17	0.08	0.03	-0.65	0.43	-0.52	0.21	0.36	-0.5	-0.4		-0.03	-0.04	0.01	-0.3	-0.19	-0.29	-0.05	-0.14	0.2	0.37	-0.1	-0.19	-0.01	-0.23		0.25	-0.65	0.77	-0.58	-0.36	-0.37	-0.08	0.51	-0.23	0.89	-0.31	-0.55
50	1	0	28.2	1.9	1	3		0.3	0.41	0.52	0.06	0.23	0.27	0.24	0.45	0.45	0.64	0.33	0.08	0.11	0.28		0.46	0.51	1.11	0.47	-0.11	0.63	0.35	0.79	0.65	1.18	0.59	0.19	0.58	0.45		0.16	0.1	0.59	0.41	-0.34	0.36	0.11	0.34	0.2	0.54	0.26	0.11
60	1	0	20.1	2.6	1	3		0.61	0.33	1.06	0.87	0.6	0.76	0.44	0.94	0.38	1.27	0.48	0.7	0.34	0.94		0.36	-0.01	0.83	0.25	0.11	0.34	0.25	0.4	-0.06	0.59	-0.03	0.06	0.28	0.68		-0.25	-0.34	-0.23	-0.62	-0.49	-0.42	-0.19	-0.54	-0.44	-0.68	-0.51	-0.64
22	1	0	24.4	3.6	1	3		0.66	0.9	1.14	0.72	0.64	0.54	0.65	0.63	0.62	0.62	0.56	0.45	0.57	0.6		-0.16	-0.22	-0.01	-0.21	0.06	0.36	-0.09	-0.23	-0.2	0.21	0.07	0.09	0.24	0.17		-0.82	-1.12	-1.15	-0.93	-0.58	-0.18	-0.74	-0.86	-0.82	-0.41	-0.49	-0.36
59	1	0	25.6	5.6	1	3		0.5	0.56	0.22	0.32	0.19	0.41	0.5	0.35	0.79	0.13	0.53	0.42	0.78	0.2		0.66	1.01	0.46	1.13	0.86	0.69	0.72	0.64	0.69	0.75	0.6	0.51	0.94	0.41		0.16	0.45	0.24	0.81	0.67	0.28	0.22	0.29	-0.1	0.62	0.07	0.09
57	1	0	24.3	3.5	1	3		0.27	0.48	0.24	0.39	0.47	0.14	0.36	0.17	0.22	0.34	0.39	0.49	0.42	0.25		0.48	0.07	0.58	0.12	0.15	0.26	0.41	0.48	0.4	0.53	0.26	0.52	0.27	0.39		0.21	-0.41	0.34	-0.27	-0.32	0.12	0.05	0.31	0.18	0.19	-0.13	0.03
50	1	1	36	5.8	1	3		-0.29	-0.47	0.33	-0.45	-0.08	-0.43	-0.35	-0.1	-0.8	0.58	-0.11	0.07	0.22	-0.15		-0.09	-0.12	0.01	-0.02	-0.42	-0.25	-0.12	-0.09	0.08	-0.01	0.25	-0.08	0.19	0.16		0.2	0.35	-0.32	0.43	-0.34	0.18	0.23	0.01	0.88	-0.59	0.36	-0.15
51	1	0	30.1	6	1	3		0.79	0.74	1.08	0.7	0.98	0.89	0.72	0.84	0.73	1.67	0.87	0.85	0.74	0.84		0.27	0.45	0.56	0.33	0.26	0.22	0.29	0.47	0.25	0.37	0.38	0.46	0.77	0.57		-0.52	-0.29	-0.52	-0.37	-0.72	-0.67	-0.43	-0.37	-0.48	-1.3	-0.49	-0.39
32	2	0	30.3	4.68	1	3		0.39	0.23	0.03	0.28	-0.14	0.04	0.27	0.46	0.53	0.63	0.22	-0.13	0.25	0.29		0.27	0.61	0.61	0.51	0.12	0.42	0.09	0.34	0.06	0.42	-0.09	-0.3	0.37	0.37		-0.12	0.38	0.58	0.23	0.26	0.38	-0.18	-0.12	-0.47	-0.21	-0.31	-0.17
60	2	0	27.1	6.68	1	3		0.24	0.53	0.32	0.4	0.49	0.11	0.4	0.1	0.47	0.2	0.66	0.42	0.05	0.25		-0.28	0	-0.48	-0.12	-0.1	-0.71	-0.16	-0.53	-0.04	-0.13	-0.11	-0.03	-0.72	-0.45		-0.52	-0.53	-0.8	-0.52	-0.59	-0.82	-0.56	-0.63	-0.51	-0.33	-0.77	-0.45
62	2	0	29.1	9.58	1	3		0.1	0.35	0.21	0.38	0.08	-0.01	0.19	-0.03	0.15	0.14	0.19	0.05	0.16	0.09		-0.11	-0.01	-0.06	-0.01	0.02	0.03	-0.02	-0.24	0.21	0.21	-0.09	0.02	-0.04	0		-0.21	-0.36	-0.27	-0.39	-0.06	0.04	-0.21	-0.21	0.06	0.07	-0.28	-0.03
63	2	0	28.9	4.6	1	3		0.01	-0.1	-0.18	0.08	-0.14	0.04	0.03	0.03	-0.17	0.11	-0.18	-0.15	0.29	0.05		0.43	0.33	0.69	0.32	0.38	0.41	0.38	0.52	0.37	0.69	0.42	0.37	0.9	0.53		0.42	0.43	0.87	0.24	0.52	0.37	0.35	0.49	0.54	0.58	0.6	0.52
56	2	0	23.3	7.3	1	3		0.1	0.66	-0.39	0.31	0.26	-0.11	0.3	-0.25	0.56	0.07	0.62	0.4	0.16	0.06		0.12	0.51	-0.05	0.52	0.63	0.01	0.28	-0.22	0.42	-0.05	0.63	0.53	-0.24	0.05		0.02	-0.15	0.34	0.21	0.37	0.12	-0.02	0.03	-0.14	-0.12	0.01	0.13
24	2	0	33.6	2.6	1	3		0.23	-0.07	0.01	-0.21	-0.16	0.39	0.17	0.3	0.43	0.26	0.24	0.09	0.47	0.3		0.39	0.19	-0.22	0.27	-0.18	0.37	0.33	-0.07	1.06	0.25	0.51	0.1	-0.45	0.09		0.16	0.26	-0.23	0.48	-0.02	-0.02	0.16	-0.37	0.63	-0.01	0.27	0.01
49	2	0	35.3	6.8	1	3		-0.46	-0.38	-0.65	-0.28	-0.72	0.08	-0.57	-0.37	-0.66	-0.14	-0.73	-0.81	0.03	-0.6		0.03	-0.01	0.55	0.42	0.23	-0.07	0	0.01	-0.11	0.53	-0.03	0.2	-0.37	0.39		0.49	0.37	1.2	0.7	0.95	-0.15	0.57	0.38	0.55	0.67	0.7	1.01
20	1	0	17.8	2	2	1		0.5	0.57	0.22	0.7	0.44	0.2	0.62	0.43	0.59	0.49	0.42	0.59	0.24	0.32		0.47	0.76	-0.21	0.48	0.81	0.53	0.82	0.21	0.86	0.09	0.7	0.76	0.09	0.11		-0.03	0.19	-0.43	-0.22	0.37	0.33	0.2	-0.22	0.27	-0.4	0.28	0.17
60	1	0	30.7	7.35	2	1		-0.16	-0.01	-0.09	0.08	-0.08	0.1	-0.04	-0.24	0.15	0.03	0.17	0.11	0.1	0.04		0.14	0.05	0.17	0.09	0.15	0.02	-0.03	0.31	0.37	0.16	0.45	0.14	0.14	0.08		0.3	0.06	0.26	0.01	0.23	-0.08	0.01	0.55	0.22	0.13	0.28	0.03
43	2	0	26	4.9	2	1		0.06	0.46	0.13	0.37	0.39	-0.04	0.36	-0.11	0.11	0.1	-0.02	0.34	0.34	-0.04		-0.16	-0.23	-0.15	-0.04	-0.32	-0.03	-0.23	-0.13	-0.16	0.06	-0.17	-0.17	-0.05	-0.2		-0.22	-0.69	-0.28	-0.41	-0.71	0.01	-0.59	-0.02	-0.27	-0.04	-0.15	-0.51
47	2	0	32.6	6.5	2	1		0.36	0.44	0.27	0.57	0.45	0.33	0.39	0.33	0.37	-0.05	0.18	0.31	-0.01	0.32		0.35	0.45	0.51	0.67	0.43	0.71	0.5	0.27	0.33	0.43	0.37	0.31	0.57	0.36		-0.01	0.01	0.24	0.1	-0.02	0.38	0.11	-0.06	-0.04	0.48	0.19	0
35	2	0	28.6	2.1	2	1		0.15	0.14	0.52	-0.15	0.25	0.01	0.32	0.09	0.08	0.34	-0.13	0.2	0.12	0.27		-0.04	-0.15	0.03	0.24	0.06	-0.5	0	-0.01	0.17	-0.11	-0.19	0.04	0.51	0.1		-0.19	-0.29	-0.49	0.39	-0.19	-0.51	-0.32	-0.1	0.09	-0.45	-0.06	-0.16
37	2	0	26.2	5.7	2	1		0.56	0.71	0.3	0.6	0.36	0.09	0.55	0.57	0.6	0.61	0.49	0.06	0.51	0.3		-0.39	-0.47	0.03	-0.95	-0.76	-0.37	-0.38	-0.49	-0.34	-0.42	-0.52	-0.62	-0.26	-0.34		-0.95	-1.18	-0.27	-1.55	-1.12	-0.46	-0.93	-1.06	-0.94	-1.03	-1.01	-0.68
49	2	0	21.3	2	2	1		-0.14	-0.01	-0.34	-0.2	-0.06	-0.13	-0.13	-0.27	0.13	-0.2	-0.04	-0.16	0	-0.28		0.2	0.04	0.41	0.23	0.17	0.2	0.15	0.18	0.2	0.24	0.38	0.11	0.15	0.35		0.34	0.05	0.75	0.43	0.23	0.33	0.28	0.45	0.07	0.44	0.42	0.27
30	1	0	21.9	2.45	2	2		-0.13	0.46	-0.06	0.14	-0.37	-0.06	-0.2	-0.01	-0.43	-0.04	-0.39	-0.64	0.26	0.04		0.22	0.14	0.65	0.24	0.14	0.31	0.11	0.43	0.07	0.34	0.16	0	0.39	0.32		0.35	-0.32	0.71	0.1	0.51	0.37	0.31	0.44	0.5	0.38	0.55	0.64
50	1	0	28.2	4.4	2	2		0.75	1.28	0.41	0.62	0.69	-0.12	1.03	0.41	0.88	0.64	0.54	0.72	0.15	0.33		0.52	0.87	0	0.6	0.63	0.43	0.7	0.35	0.39	0.29	0.28	0.11	0.44	0.18		-0.23	-0.41	-0.41	-0.02	-0.06	0.55	-0.33	-0.06	-0.49	-0.35	-0.26	-0.61
30	1	0	21	4.86	2	2		0.03	0.05	0.52	-0.05	0.19	0.16	0.13	0.07	0.1	0.42	-0.07	0.09	0.13	0.2		0.39	-0.1	0.34	-0.02	-0.18	0.42	0.22	0.51	0.12	0.02	0.72	0	0.72	0.37		0.36	-0.15	-0.18	0.03	-0.37	0.26	0.09	0.44	0.02	-0.4	0.79	-0.09
31	1	0	21.2	3.84	2	2		0.15	0.45	-0.01	0.25	0.03	-0.03	0.13	0.01	0.18	-0.05	0.11	0.06	0.05	0.03		0.78	0.62	0.84	0.4	0.65	0.22	0.83	0.92	0.61	1.1	0.5	0.68	0.63	0.54		0.63	0.17	0.85	0.15	0.62	0.25	0.7	0.91	0.43	1.15	0.39	0.62
48	2	0	23.9	4.84	2	2		-0.12	-0.12	-0.06	-0.11	-0.09	-0.36	-0.07	-0.22	0.07	0.11	0.08	0.02	-0.29	-0.2		0.36	0.35	0.1	0.47	0.51	0.5	0.36	0.11	0.48	-0.17	0.42	0.32	0.26	0.14		0.48	0.47	0.16	0.58	0.6	0.86	0.43	0.33	0.41	-0.28	0.34	0.3
56	2	1	35.9	1.01	2	2		-0.01	-0.1	0.38	-0.07	0.1	-0.08	-0.07	0.21	-0.05	0.79	-0.13	-0.02	0.41	0.36		0.68	0.48	0.78	0.52	0.23	0.81	0.69	0.85	0.51	1.04	-0.11	0.15	0.32	0.75		0.69	0.58	0.4	0.59	0.13	0.89	0.76	0.64	0.56	0.25	0.02	0.17
60	2	0	19.2	3.5	2	2		0.24	0.24	0.37	0.26	0.19	0.34	0.21	0.31	0.18	0.72	0.21	0.2	0.51	0.48		0.12	0.44	-0.21	0.2	0.34	0.04	0.25	0.06	0.26	0.07	0.34	0.41	0.18	0.13		-0.12	0.2	-0.58	-0.06	0.15	-0.3	0.04	-0.25	0.08	-0.65	0.13	0.21
59	2	1	19.3	4	2	2		0.27	0.33	0.42	0.53	-0.51	-0.08	0.01	0.43	0.18	0.16	0.66	-0.07	-0.13	0.03		0.78	0.54	0.81	0.68	0.37	0.55	0.83	1.02	0.75	0.95	0.67	0.55	0.73	0.31		0.51	0.21	0.39	0.15	0.88	0.63	0.82	0.59	0.57	0.79	0.01	0.62
44	2	0	22.5	2.55	2	2		0.18	0.12	0.35	0.16	0.13	0.17	0.24	0.22	0.41	0.13	0.32	0.31	0.2	0.24		-0.04	-0.09	0.02	0.17	0.26	-0.26	-0.05	-0.08	-0.1	0.03	0.11	0.24	0.12	0.01		-0.22	-0.21	-0.33	0.01	0.13	-0.43	-0.29	-0.3	-0.51	-0.1	-0.21	-0.07
64	1	0	34.5	2.95	2	3		0.14	0.08	0.3	0.37	-0.12	0.01	0.04	0.29	-0.1	0.58	0.12	0.09	0.54	0.31		0.47	0.45	0.1	0.39	0.17	0.71	0.48	0.53	0.66	0.66	0.47	0.27	0.38	0.27		0.33	0.37	-0.2	0.02	0.29	0.7	0.44	0.24	0.76	0.08	0.35	0.18
49	1	0	29.7	2	2	3		-0.04	-0.01	0.12	-0.29	-0.1	-0.23	-0.08	0.05	0.17	0.13	-0.04	-0.02	-0.31	-0.11		0.18	0.25	0.3	-0.05	-0.04	-0.16	0.04	0.34	-0.18	0.57	-0.14	-0.32	0.07	0.13		0.22	0.26	0.18	0.24	0.06	0.07	0.12	0.29	-0.35	0.44	-0.1	-0.3
36	1	0	26	2.2	2	3		-0.31	-0.3	0.74	-0.63	-0.29	-0.56	-0.32	-0.45	-0.2	0.55	-0.31	-0.22	0.17	0.17		0.1	-0.22	0.49	-0.3	0.14	0.44	-0.01	0.17	0.18	0.38	0.29	0.31	0.17	0.12		0.41	0.08	-0.25	0.33	0.43	1	0.31	0.62	0.38	-0.17	0.6	0.53
53	1	0	25.7	4.2	2	3		-0.18	-0.47	0.32	-0.33	-0.57	-0.16	-0.21	-0.04	-0.42	0.53	-0.6	-0.46	-0.05	-0.05		1	0.94	1.33	0.84	0.74	0.8	0.99	1.09	1.39	1.22	1.32	0.82	0.93	0.83		1.18	1.41	1.01	1.17	1.31	0.96	1.2	1.13	1.81	0.69	1.92	1.28
64	1	0	31.8	4.42	2	3		0.39	0.85	-0.25	0.44	-0.09	0.1	0.6	0.08	1.14	0.24	0.34	0	-0.31	0.03		0.53	0.5	0.38	0.21	0.46	0.26	0.52	0.68	0.52	0.28	0.01	0.21	0.45	0.3		0.14	-0.35	0.63	-0.23	0.55	0.16	-0.08	0.6	-0.62	0.04	-0.33	0.21
49	2	0	22	0.73	2	3		0.22	0.46	0.05	0.21	0.53	0.39	0.35	-0.12	0.81	-0.32	0.58	0.43	0.39	-0.03		0.27	0.12	0.18	0.13	0.16	0.14	0.29	0.2	0.36	0.35	0.35	0.4	0.35	0.24		0.05	-0.34	0.13	-0.08	-0.37	-0.25	-0.06	0.32	-0.45	0.67	-0.23	-0.03
50	2	0	24.1	3.78	2	3		-0.27	-0.52	-0.37	-0.68	0.24	-0.44	-0.13	-0.08	-0.27	-0.16	-0.07	0.16	0.11	-0.17		0.55	0.48	-0.08	0.72	1.17	0.12	0.74	0.58	0.61	0.47	0.97	1.24	0.28	0.17		0.82	1	0.29	1.4	0.93	0.56	0.87	0.66	0.88	0.63	1.04	1.08
64	2	0	24.4	5.74	2	3		0.27	0.31	0.52	0.25	0.21	0.47	0.3	0.35	0.74	0.64	0.6	0.38	0.59	0.57		-0.08	0	-0.12	0.26	0.18	-0.5	0.04	-0.1	-0.03	0.4	0.11	0.13	-0.46	-0.06		-0.35	-0.31	-0.64	0.01	-0.03	-0.97	-0.26	-0.45	-0.77	-0.24	-0.49	-0.25
33	2	0	29	4.05	2	3		-0.4	-0.58	-0.5	0	-0.26	-0.42	-0.38	-0.29	-1.08	-0.62	-0.62	-0.14	-0.01	-0.21		-0.29	-0.38	-0.84	-0.21	-0.42	-0.15	-0.3	-0.3	-0.36	-0.42	-0.07	-0.2	0.05	-0.26		0.11	0.2	-0.34	-0.21	-0.16	0.27	0.08	-0.01	0.72	0.2	0.55	-0.06
65	2	0	21.3	5.3	2	3		-0.66	-0.83	-0.94	-0.72	-0.55	0.27	-0.57	-0.89	-0.87	-0.47	-0.93	-0.64	-0.28	-0.33		0.63	0.8	0.46	0.63	0.42	0.55	0.55	0.72	0.49	0.63	0.38	0.34	0.65	0.66		1.29	1.63	1.4	1.35	0.97	0.28	1.12	1.61	1.36	1.1	1.31	0.98
52	2	1	21	2.3	2	3		0	-0.17	0.21	-0.2	-0.15	0.13	-0.02	0.1	-0.1	0.36	-0.06	-0.13	-0.14	-0.05		0.11	0.47	-0.21	0.61	0.62	0.29	0.01	0.09	0.5	-0.31	0.38	0.44	0.29	0.05		0.11	0.64	-0.42	0.81	0.77	0.16	0.03	-0.01	0.6	-0.67	0.44	0.57
74	2	0	22.4	3.5	2	3		-0.07	-0.41	0.2	-0.62	-0.23	0.02	-0.12	0.01	-0.4	0.51	0.07	-0.35	-0.21	0.22		0.2	0.08	0.5	0.14	-0.04	0.58	0.07	0.32	-0.03	0.08	0.2	-0.15	0.44	0.3		0.27	0.49	0.3	0.76	0.19	0.56	0.19	0.31	0.37	-0.43	0.13	0.2
42	2	0	21.8	1.2	2	3		0.4	0.19	0.52	0.41	0.27	0.8	0.4	0.38	0.41	0.36	0.29	0.43	0.39	0.56		-0.14	-0.16	0.06	-0.02	-0.12	0.08	-0.09	-0.22	-0.01	0.03	-0.3	-0.16	0.03	-0.01		-0.54	-0.35	-0.46	-0.43	-0.39	-0.72	-0.49	-0.6	-0.42	-0.33	-0.59	-0.59
55	2	0	23.9	7	2	3		0.04	0.01	0.18	-0.02	0.18	0.28	0.02	0.05	0	0.23	0	0	0.23	0.05		-0.18	0.09	0.07	-0.17	-0.08	-0.21	-0.08	-0.29	-0.12	-0.19	-0.45	-0.12	-0.05	-0.34		-0.22	0.08	-0.11	-0.15	-0.26	-0.49	-0.1	-0.34	-0.12	-0.42	-0.45	-0.12
56	2	1	34.5	3.1	2	3		0.08	-0.06	0.21	0.26	-0.13	-0.02	-0.08	0.18	-0.33	0.2	-0.04	0.06	0.09	0.01		0.27	0.06	0.21	-0.09	0.05	0.07	0.21	0.27	0.1	0.4	0.28	0.27	0.19	0.21		0.19	0.12	0	-0.35	0.18	0.09	0.29	0.09	0.43	0.2	0.32	0.21
35	2	0	28.1	4.8	2	3		0.07	0.04	-0.25	-0.52	-0.09	-0.5	0.34	0.02	0.22	-0.07	0.21	0.2	-0.03	-0.1		-0.12	0.09	-0.04	0.07	0.19	-0.22	-0.04	-0.03	-0.04	0.2	0.32	0.19	0.03	-0.04		-0.19	0.05	0.21	0.59	0.28	0.28	-0.38	-0.05	-0.26	0.27	0.11	-0.01
47	2	0	40.8	2.8	2	3		0.35	0.21	0.59	0.35	0.48	0.5	0.38	0.38	0.55	0.57	0.62	0.75	0.35	0.42		1.33	1.58	1.08	1.21	1.23	0.86	1.48	1.29	1.83	0.93	1.3	1.31	1.01	0.95		0.98	1.37	0.49	0.86	0.75	0.36	1.1	0.91	1.28	0.36	0.68	0.56
21	2	0	35.2	8.3	2	3		-0.42	-0.37	-0.59	-0.15	-0.6	0.06	-0.5	-0.4	-0.49	-0.18	-0.66	-0.66	0.04	-0.55		0.03	0.39	-0.49	0.48	0.2	0.27	0.17	-0.1	0.37	0.15	0.37	0.59	0.21	0.02		0.45	0.76	0.1	0.63	0.8	0.21	0.67	0.3	0.86	0.33	1.03	1.25
35	2	0	28.8	2.1	2	3		0.63	1.26	0.2	0.43	1.11	0.15	0.98	0.32	1.42	0.56	0.84	1.31	0.39	0.48		0.39	0.81	0.18	0.49	0.56	0.18	0.51	0.17	0.39	0.45	0.43	0.58	0.33	0.23		-0.24	-0.45	-0.02	0.06	-0.55	0.03	-0.47	-0.15	-1.03	-0.11	-0.41	-0.73
61	2	1	21.4	7.5	2	3		0.16	0.4	-0.16	0.56	0.23	0.42	0.22	0.04	0.41	-0.08	0.41	0.39	-0.04	0.05		-0.08	-0.18	-0.25	-0.33	-0.42	-0.22	-0.08	-0.15	0.1	0.43	0.08	0	0.11	0.05		-0.24	-0.58	-0.09	-0.89	-0.65	-0.64	-0.3	-0.19	-0.31	0.51	-0.33	-0.39
45	1	0	25.1	1.07	3	1		0.9	0.98	0.47	0.61	0.95	0.6	1.12	0.75	0.99	0.21	0.61	1.04	0.82	0.45		-0.23	0.17	-0.33	-0.26	0.02	-0.56	0.01	-0.38	-0.01	-0.08	-0.46	-0.4	-0.12	-0.37		-1.13	-0.81	-0.8	-0.87	-0.93	-1.16	-1.11	-1.13	-1	-0.29	-1.07	-1.44
55	1	1	31.9	4.4	3	1		0.22	0.74	-0.07	0.3	0.77	0.09	0.42	0	0.35	-0.01	0.27	0.44	0.18	0.11		-0.06	0.42	-0.9	0.49	0.41	0.15	0.03	-0.36	0.43	-0.57	0.55	0.55	0.16	-0.23		-0.28	-0.32	-0.83	0.19	-0.36	0.06	-0.39	-0.36	0.08	-0.56	0.28	0.11
35	1	0	24.3	4.6	3	1		-0.1	-0.13	0.16	0.09	0.07	0.13	-0.06	-0.25	0.11	-0.22	0.11	0.27	-0.15	-0.04		0.02	0.07	0.43	-0.4	0.29	-0.05	-0.06	0.06	0.24	0.12	0.29	0.11	-0.23	0.16		0.12	0.2	0.27	-0.49	0.22	-0.18	0	0.31	0.13	0.34	0.18	-0.16
49	1	1	33.3		3	1		0.36	0.04	0.19	0.49	0.24	0.44	0.22	0.55	0.72	0.15	0.72	0.1	0.88	0.39		-0.05	-0.5	0.18	-0.73	-0.33	-0.21	-0.17	0.2	-0.28	0.3	-0.09	-0.3	0.18	0.03		-0.41	-0.54	-0.01	-1.22	-0.57	-0.65	-0.39	-0.35	-1	0.15	-0.81	-0.4
45	1	1	38.2	2.93	3	1		0.55	0.65	0.28	0.44	0.53	0.35	0.69	0.44	0.97	0.26	0.51	0.5	0.46	0.22		0.16	0.13	0.17	-0.02	0.15	0.06	0.16	0.23	0.01	0.5	0.04	0.24	0.79	0.52		-0.39	-0.52	-0.11	-0.46	-0.38	-0.29	-0.53	-0.21	-0.96	0.24	-0.47	-0.26
47	1	1	32.3	0.88	3	1		-0.09	-0.04	0.01	-0.03	0.34	0.07	0.11	-0.26	-0.21	-0.49	0.09	0.17	0.15	0.06		-0.15	-0.6	-0.07	-0.47	-0.05	-0.35	-0.17	-0.19	-0.24	0.04	-0.25	0.05	0.07	0.17		-0.06	-0.56	-0.08	-0.44	-0.39	-0.42	-0.28	0.07	-0.03	0.53	-0.34	-0.12
49	1	1	40.5	3.82	3	1		0.52	0.27	0.76	0.64	0.35	0.58	0.32	0.85	0.1	0.9	0.33	0.59	0.96	0.62		0.59	0.58	1.05	0.62	0.62	0.67	0.53	0.54	0.65	0.59	0.66	0.62	0.36	0.35		0.07	0.31	0.29	-0.02	0.27	0.09	0.21	-0.31	0.55	-0.31	0.33	0.03
50	1	1	34.1	3.82	3	1		0.14	0.04	0.1	0.24	0.06	-0.16	0.1	0.18	0.12	0.5	0.11	-0.06	0.15	-0.11		0.15	0.04	0.47	-0.08	0.03	-0.29	0.05	0.24	0.08	0.5	0.07	-0.09	0.24	-0.13		0.01	0	0.37	-0.32	-0.03	-0.13	-0.05	0.06	-0.04	0	-0.04	-0.03
45	1	1	27.2	8.39	3	1		1.09	1.42	0.62	1.65	1.19	1.12	1.11	1.03	1.54	0.96	1.32	0.9	0.76	0.71		0.06	0.04	-0.04	0.4	0.02	0.21	0.11	-0.04	0.14	-0.01	0.18	-0.01	0.32	0.02		-1.03	-1.38	-0.66	-1.25	-1.17	-0.91	-1	-1.07	-1.4	-0.97	-1.14	-0.91
48	2	0	27.4	0.69	3	1		0.3	0.71	-0.17	0.6	-0.05	0.36	0.36	0.19	0.55	0.07	0.4	-0.08	0.52	0.09		0.06	0.23	-0.41	0.66	0.06	0.11	-0.03	0.1	0.28	0.03	0.34	0.22	0.7	0.23		-0.24	-0.48	-0.24	0.06	0.11	-0.25	-0.39	-0.09	-0.27	-0.04	-0.06	0.3
35	2	1	20.4	4.4	3	1		-0.33	-0.21	-0.28	-0.22	-0.14	-0.07	-0.24	-0.44	-0.14	-0.26	-0.4	-0.03	-0.06	-0.24		-0.09	-0.09	-0.04	-0.22	0.01	-0.28	-0.12	-0.05	0.05	0.31	0.03	0.03	-0.15	0.04		0.24	0.12	0.24	0	0.15	-0.21	0.12	0.39	0.19	0.57	0.43	0.06
41	1	0	25.2	5.4	3	2		0.06	0.24	0.31	0.02	0.01	0.03	0.02	0.1	-0.11	0.37	-0.25	-0.03	0.04	0.1		-0.44	-0.2	-0.87	-0.04	-0.26	-0.55	-0.26	-0.55	-0.16	-0.42	-0.06	-0.11	-0.57	-0.54		-0.5	-0.44	-1.18	-0.06	-0.27	-0.58	-0.28	-0.65	-0.05	-0.79	0.19	-0.08
41	1	0	30	4.8	3	2		0.03	-0.03	0.51	-0.36	0.02	0.11	0	-0.03	-0.36	-0.03	-0.43	-0.13	-0.39	0.06		0.44	0.22	0.38	0.29	0.29	0.68	0.55	0.38	0.69	0.41	0.19	0.2	0.67	0.34		0.41	0.25	-0.13	0.65	0.27	0.57	0.55	0.41	1.05	0.44	0.62	0.33
40	1	0	26.6	5.03	3	2		0.82	1.08	1	0.99	0.98	1.02	0.92	0.73	1.29	0.68	1.05	0.91	0.58	0.76		-0.11	-0.31	0	-0.38	-0.13	0.29	-0.05	-0.2	-0.04	-0.01	-0.21	-0.01	0.1	0.12		-0.93	-1.39	-1	-1.37	-1.11	-0.73	-0.97	-0.93	-1.33	-0.69	-1.26	-0.92
52	1	0	31	3.28	3	2		0.31	0.22	0.7	0.3	0.15	0.59	0.31	0.26	0.29	0.32	0.29	0.19	0.36	0.44		0.65	0.93	0.14	1.27	0.7	0.93	0.72	0.83	0.57	-0.11	0.81	0.6	0.49	0.33		0.34	0.71	-0.56	0.97	0.55	0.34	0.41	0.57	0.28	-0.43	0.52	0.41
41	1	1	26.5	5.3	3	2		0.65	0.76	0.09	0.36	0.76	0.17	0.74	0.49	1.09	-0.4	0.98	0.9	0.34	0.1		-0.26	-0.37	-0.31	-0.13	-0.44	-0.17	-0.23	-0.25	-0.34	-0.21	-0.24	-0.59	0.05	-0.1		-0.91	-1.13	-0.4	-0.49	-1.2	-0.34	-0.97	-0.74	-1.43	0.19	-1.22	-1.49
39	1	0	24.8	2.78	3	2		-0.24	-0.48	-0.38	-0.52	-0.23	-0.33	-0.24	-0.23	-0.48	-0.11	-0.01	0.08	0.5	-0.03		0.03	0.3	0.34	0.11	-0.02	-0.01	0.14	0.04	0.02	0.46	0.04	0.18	-0.2	0.08		0.27	0.78	0.72	0.63	0.21	0.32	0.38	0.27	0.5	0.57	0.05	0.1
31	1	0	22.5	4	3	2		0.41	0.42	0.49	0.23	0.29	0.33	0.54	0.24	0.95	0.12	0.56	0.52	0.33	0.12		0.31	0.27	0.24	0.13	-0.06	0.71	0.28	0.32	0.84	0.69	0.31	0.33	0	0.25		-0.1	-0.15	-0.25	-0.1	-0.35	0.38	-0.26	0.08	-0.11	0.57	-0.25	-0.19
42	1	0	28.6	2.05	3	2		0.03	0.04	-0.25	-0.04	0.03	0.01	0.13	-0.06	-0.02	-0.27	0.02	-0.02	0.45	0.16		0.14	0.13	0.36	0.08	-0.07	0.4	0.23	-0.01	0.26	0.06	0.04	-0.03	0.55	0.31		0.11	0.09	0.61	0.12	-0.1	0.39	0.1	0.05	0.28	0.33	0.02	-0.01
63	1	0	27	2.5	3	2		-0.19	0.07	-0.16	0.06	0.03	0.21	-0.13	-0.26	0.14	-0.22	-0.14	-0.31	-0.18	0.07		-0.56	-0.44	-0.39	-0.48	-0.58	-0.56	-0.67	-0.28	-0.58	-0.43	-0.46	-0.6	0.06	-0.08		-0.37	-0.51	-0.23	-0.54	-0.61	-0.77	-0.54	-0.02	-0.72	-0.21	-0.32	-0.29
51	1	0	36.8	4.4	3	2		0.04	-0.07	-0.39	-0.03	0.2	-0.22	0.12	-0.05	0.21	-0.21	0.45	0.16	0.22	0.09		-0.01	-0.31	0.46	-0.09	-0.3	-0.41	-0.16	0.06	-0.1	-0.15	-0.17	-0.21	0.15	0.05		-0.05	-0.24	0.85	-0.06	-0.5	-0.19	-0.28	0.11	-0.31	0.06	-0.62	-0.37
49	1	0	30.7	7.2	3	2		0.26	0.01	0.06	0.34	0.16	0.05	0.33	0.22	0.52	0.46	0.28	0.51	-0.15	0.22		0.02	0.07	0.15	0.16	-0.16	0.39	-0.11	0.04	0.03	0.29	0.23	-0.04	0.06	-0.03		-0.24	0.06	0.09	-0.18	-0.32	0.34	-0.44	-0.18	-0.49	-0.17	-0.05	-0.55
47	1	0	25	6.91	3	2		0.01	-0.05	-0.51	0.16	0.09	0.41	0.11	-0.2	0.27	-0.45	0.14	0.33	0.2	0.12		0.3	0.21	0.29	0.3	0.1	0.44	0.2	0.42	-0.01	0.32	0.07	0.11	0.11	0.08		0.29	0.26	0.8	0.14	0.01	0.03	0.09	0.62	-0.28	0.77	-0.07	-0.22
57	1	0	29.3	2.75	3	2		0.6	0.9	0.01	0.71	0.8	0.88	0.79	0.36	1.49	-0.39	1.31	0.97	0.65	0.27		0.71	0.6	0.81	0.53	0.58	0.83	0.7	0.78	0.75	0.43	0.56	0.62	0.59	0.59		0.11	-0.3	0.8	-0.18	-0.22	-0.05	-0.09	0.42	-0.74	0.82	-0.75	-0.35
50	1	1	23	2.04	3	2		0.3	0.08	0.55	0.21	0.2	0.06	0.25	0.42	0.33	0.47	0.32	0.31	0.18	0.22		-0.13	-0.18	-0.29	0.05	-0.01	-0.07	-0.08	-0.16	-0.13	0.06	0.01	-0.1	0.2	0		-0.43	-0.26	-0.84	-0.16	-0.21	-0.13	-0.33	-0.58	-0.46	-0.41	-0.31	-0.41
51	1	0	29.9	3.17	3	2		0.06	0.32	0.34	0.18	0.2	-0.12	0.06	0.11	0.2	0.82	0.05	0.07	-0.37	-0.24		0.6	0.53	0.63	0.63	0.57	0.75	0.57	0.64	0.45	0.36	0.37	0.59	0.67	0.5		0.54	0.21	0.29	0.45	0.37	0.87	0.51	0.53	0.25	-0.46	0.32	0.52
50	1	1	30.7	3.29	3	2		0.12	-0.06	0.04	-0.12	0.03	0.15	0.06	0.13	0.4	0.11	0.34	0.27	0.13	0.01		0.28	0.03	0.46	0.26	-0.09	0.38	0.14	0.5	-0.13	0.42	0.06	-0.02	0.29	0.36		0.16	0.09	0.42	0.38	-0.12	0.23	0.08	0.37	-0.53	0.31	-0.28	-0.29
45	1	1	26	3.71	3	2		0.28	0.74	0.02	0.28	0.52	-0.12	0.69	0	0.94	-0.38	0.2	0.26	-0.06	-0.2		-0.15	0.03	0	-0.31	0.21	0.08	-0.07	-0.08	0.19	0.06	-0.14	0.21	-0.2	-0.15		-0.43	-0.71	-0.02	-0.59	-0.31	0.2	-0.76	-0.08	-0.75	0.44	-0.34	-0.05
53	1	0	30.8	3.73	3	2		0.06	0.15	-0.2	0.36	0.65	0.01	0.12	0.1	0.14	0.3	0.48	0.48	0.22	0.2		-0.04	0.08	0.13	0	0.25	-0.13	0.08	-0.02	0.22	-0.43	0.27	0.38	-0.03	0		-0.1	-0.07	0.33	-0.36	-0.4	-0.14	-0.04	-0.12	0.08	-0.73	-0.21	-0.1
31	1	0	26.2	7.95	3	2		0.26	-0.07	0.24	0.06	0.43	0.21	0.22	0.31	0.33	0.59	0.08	0.43	0.32	0.28		0.17	0.15	0.48	0.18	0.39	0.48	0.12	0.27	-0.11	0.57	0.11	0.09	0.4	0.32		-0.09	0.22	0.24	0.12	-0.04	0.27	-0.1	-0.04	-0.44	-0.02	0.03	-0.34
48	2	0	39.3	3.2	3	2		0.2	0.6	-0.54	0.68	0.49	-0.08	0.48	-0.1	0.48	-0.44	0.04	0.38	-0.19	-0.21		-0.44	-0.43	-0.82	-0.27	-0.35	-0.37	-0.44	-0.61	-0.45	-0.73	-0.46	-0.38	-0.79	-0.83		-0.64	-1.03	-0.28	-0.95	-0.84	-0.29	-0.92	-0.51	-0.93	-0.29	-0.5	-0.76
33	2	0	22.3	1.7	3	2		0.85	0.88	0.83	0.63	0.47	0.75	0.96	0.92	1.22	0.35	0.94	0.96	0.69	0.49		-0.59	-0.48	-0.9	-0.64	-0.43	-0.37	-0.51	-0.87	-0.61	-0.66	-0.41	-0.55	-0.23	-0.53		-1.44	-1.36	-1.73	-1.27	-0.9	-1.12	-1.47	-1.79	-1.83	-1.01	-1.35	-1.51
41	2	1	29.2	2.9	3	2		0.62	0.69	0.83	0.85	0.39	0.41	0.65	0.73	0.9	0.35	0.92	0.6	0.37	0.36		0.49	0.43	0.68	0.06	0.38	0.09	0.56	0.61	0.53	0.49	0.48	0.48	0.3	0.33		-0.13	-0.26	-0.15	-0.79	-0.01	-0.32	-0.09	-0.12	-0.37	0.14	-0.44	-0.12
47	2	1	23.2	9	3	2		0.65	0.6	0.65	0.82	0.59	0.82	0.65	0.73	0.78	0.99	0.68	0.71	0.53	0.31		-0.53	-0.55	-0.61	-0.61	-0.55	-0.29	-0.57	-0.4	-1.07	-0.01	-0.84	-0.86	-0.66	-0.57		-1.18	-1.15	-1.26	-1.43	-1.14	-1.11	-1.22	-1.13	-1.85	-1	-1.52	-1.57
41	1	1	33	3.5	3	3		-0.36	-0.24	-0.55	-0.53	-0.14	-0.9	-0.15	-0.47	-0.28	-0.45	-0.42	-0.1	-0.13	-0.42		0.16	0.36	0.12	0.43	-0.05	0.21	0.15	0.03	0.38	0.11	0.24	-0.11	-0.04	0.07		0.52	0.6	0.67	0.96	0.09	1.11	0.3	0.5	0.66	0.56	0.66	-0.01
43	1	0	28.7	6.5	3	3		-0.3	0.1	0.04	0.26	0.18	-0.15	-0.22	-0.32	-0.36	-0.29	-0.14	0.05	0.14	-0.05		-0.04	0.57	0	0.73	0.25	0.26	0.08	-0.24	-0.06	0.14	0.34	0.2	-0.31	0.04		0.26	0.47	-0.04	0.47	0.07	0.41	0.3	0.08	0.3	0.43	0.48	0.15
41	1	0	34	3	3	3		0.42	0.5	-0.66	0.28	-0.18	0.18	0.36	0.05	0.68	-0.88	0.43	-0.16	0.09	-0.01		0.19	0.21	0.04	0.16	0.43	0.03	0.25	0.28	0.08	0.18	0.2	0.42	0.19	0.15		-0.23	-0.29	0.7	-0.12	0.61	-0.15	-0.11	0.23	-0.6	1.06	-0.23	0.58
41	1	0	40.3	5.2	3	3		1.12	1.18	0.28	0.83	0.69	0.89	1.26	0.97	1.84	0.68	1.67	1.25	0.9	0.56		0.19	0.13	0.09	0.2	0.08	0.18	0.13	0.32	-0.24	0.51	-0.12	-0.32	0.42	0.22		-0.93	-1.05	-0.19	-0.63	-0.61	-0.71	-1.13	-0.65	-2.08	-0.17	-1.79	-1.57
46	1	0	31.9	6.2	3	3		-0.31	-0.59	-0.03	-0.24	0.01	-0.21	-0.37	-0.21	-0.44	0.02	-0.32	0.05	-0.24	-0.23		0.04	0.13	0.06	0.1	0.18	0.05	0.1	0.02	0.05	-0.45	-0.02	0.13	0.31	-0.07		0.35	0.72	0.09	0.34	0.17	0.26	0.47	0.23	0.49	-0.47	0.3	0.08
55	1	0	28	5.2	3	3		0	0.13	-0.02	0.04	0.19	0.29	0.06	-0.06	0.16	-0.18	-0.02	0.02	-0.13	-0.06		0.2	0.37	0.08	0.26	0.19	0.03	0.27	0.07	0.22	0.35	0.27	0.13	0.1	0.16		0.2	0.24	0.1	0.22	0	-0.26	0.21	0.13	0.06	0.53	0.29	0.11
53	1	0	33.4	4.56	3	3		0.43	-0.07	1.1	0.04	-0.14	0.16	0.35	0.7	0.19	1.01	0.18	0.12	0.47	0.52		0.6	0.24	0.93	0.19	0.38	0.39	0.53	0.87	0.99	0.8	0.68	0.61	0.08	0.44		0.17	0.31	-0.17	0.15	0.52	0.23	0.18	0.17	0.8	-0.21	0.5	0.49
39	1	0	24.6	6.46	3	3		0.38	0.37	0.84	0.21	0.07	0.98	0.43	0.38	0.61	0.53	0.43	0.26	0.4	0.56		0.37	0.79	0.04	0.82	0.84	0.23	0.46	0.14	0.76	0.42	0.48	0.4	-0.04	0.23		-0.01	0.42	-0.8	0.61	0.77	-0.75	0.03	-0.24	0.15	-0.11	0.05	0.14
47	1	0	23.1	3.36	3	3		0.21	0.41	-0.07	0.42	0.52	0.31	0.39	-0.09	0.6	-0.68	0.56	0.59	0.26	-0.05		0.01	-0.01	-0.03	0.25	0.21	-0.01	0.03	-0.02	0.04	-0.1	0.22	0.55	0.37	0.28		-0.2	-0.42	0.04	-0.17	-0.31	-0.32	-0.36	0.07	-0.56	0.58	-0.34	-0.04
50	1	0	32.4	7.86	3	3		0.76	0.49	0.18	0.69	0.67	0.32	0.79	0.76	0.48	0.75	0.58	0.67	-0.05	0.38		-0.02	0.04	0.26	0.6	0.37	-0.1	0.14	0.11	-0.09	0.47	0.01	0.23	-0.49	0.05		-0.78	-0.45	0.08	-0.09	-0.3	-0.42	-0.65	-0.65	-0.57	-0.28	-0.57	-0.44
40	1	0	35.8	8.01	3	3		0.54	0.51	0.4	0.37	0.72	0.51	0.57	0.52	0.41	0.52	0.72	0.58	0.8	0.55		0.2	0.22	0.11	0.03	0.43	0.12	0.27	0.11	0.13	0.13	0.07	0.29	0.06	0.07		-0.34	-0.29	-0.29	-0.34	-0.29	-0.39	-0.3	-0.41	-0.28	-0.39	-0.65	-0.29
41	1	1	27.2	2.2	3	3		0.28	0.48	0.5	0.51	0.5	0.49	0.38	0.17	0.28	0.36	0.3	0.39	0.1	0.19		0.28	0.79	-0.03	0.28	0.65	0.13	0.61	-0.14	0.76	0.12	0.3	0.35	-0.11	0.09		0	0.31	-0.53	-0.23	0.15	-0.36	0.23	-0.31	0.48	-0.24	0	-0.04
52	1	1	34.6	4.31	3	3		0.81	0.67	1.38	0.9	0.66	0.62	0.88	0.99	0.97	0.69	1.16	1.23	0.73	0.85		-0.01	-0.22	0.17	-0.01	-0.17	0.08	-0.01	0.04	-0.02	0	0.13	-0.05	-0.03	-0.04		-0.82	-0.89	-1.21	-0.91	-0.83	-0.54	-0.89	-0.95	-0.99	-0.69	-1.03	-1.28
48	1	0	38.3	2.06	3	3		0.22	0.93	0.35	0.55	0.49	0.82	0.21	0.33	-0.12	0.48	-0.07	-0.33	0.55	0.39		0.19	0.25	0	0.17	-0.06	0.12	0.14	0.27	-0.01	0.21	-0.06	-0.13	0.26	0.07		-0.03	-0.68	-0.35	-0.38	-0.55	-0.7	-0.07	-0.06	0.11	-0.27	0.01	0.2
55	1	1	41.3	5.58	3	3		-0.21	-0.21	-0.11	0.02	0.15	0.05	-0.29	-0.15	-0.38	0.32	0.02	0.09	0.19	0.03		-0.57	-1.19	-0.63	-0.76	-0.68	-0.72	-0.81	-0.41	-0.86	-0.02	-0.26	-0.28	0.09	-0.39		-0.36	-0.98	-0.52	-0.78	-0.83	-0.77	-0.52	-0.26	-0.48	-0.34	-0.28	-0.37
55	1	0	28.3	4.62	3	3		-0.32	-0.49	-0.7	-0.33	-0.12	-0.1	-0.25	-0.28	-0.35	-0.14	-0.1	-0.15	-0.14	-0.01		-0.14	-0.23	0.3	-0.05	0.07	0.2	-0.15	0	-0.2	-0.14	-0.14	0.12	-0.19	0.27		0.18	0.26	1	0.28	0.19	0.3	0.1	0.28	0.15	0	-0.04	0.27
56	1	1	39	2.2	3	3		0.49	0.89	-0.03	0.65	0.7	0.37	0.66	0.28	0.55	-0.2	0.55	0.56	0.86	0.29		0.22	0.18	0.4	0.3	0.3	0.25	0.16	0.24	0.12	0.38	0.45	0.29	0.42	0.3		-0.27	-0.71	0.43	-0.35	-0.4	-0.12	-0.5	-0.04	-0.43	0.58	-0.1	-0.27
72	1	0	23.2	3.19	3	3		0.22	-0.1	0.34	0.09	-0.2	0.49	0.09	0.32	0.11	0.29	0.04	0.1	0.01	0.42		-0.15	-0.6	0.37	-0.56	-0.65	0.19	-0.23	-0.01	-0.63	-0.09	-0.34	-0.57	0.1	0.12		-0.37	-0.5	0.03	-0.65	-0.45	-0.3	-0.32	-0.33	-0.74	-0.38	-0.38	-0.67
52	1	0	32.5	1.4	3	3		-0.23	-0.5	-0.35	-0.15	-0.07	0.16	-0.39	-0.28	-1.36	0.01	-0.33	-0.58	-0.31	-0.02		0.54	0.58	0.29	0.47	0.77	0.77	0.58	0.41	0.57	-0.11	0.66	0.53	0.56	0.65		0.77	1.08	0.64	0.62	0.84	0.61	0.97	0.69	1.93	-0.12	0.99	1.11
57	1	0	30.6	0.47	3	3		0.56	0.32	1.17	0.54	0.36	0.22	0.26	0.87	0.5	0.83	0.59	0.53	0.75	0.4		-0.22	-0.13	-0.34	-0.14	0.1	-0.2	-0.23	-0.22	-0.24	-0.06	-0.24	-0.14	-0.08	-0.05		-0.78	-0.45	-1.51	-0.68	-0.26	-0.42	-0.49	-1.09	-0.74	-0.89	-0.83	-0.67
49	1	1	26.6	2.41	3	3		0.05	-0.14	-0.1	-0.13	0.06	0.46	0.1	0.06	0.05	-0.42	0.15	0.36	-0.16	0.12		-0.1	-0.18	-0.16	-0.21	-0.02	-0.2	-0.07	-0.08	-0.04	0.16	0.16	0.26	0.1	0.15		-0.15	-0.04	-0.06	-0.08	-0.08	-0.66	-0.17	-0.14	-0.09	0.58	0.01	-0.1
59	1	1	27.4	3.9	3	3		0.49	0.05	0.59	0.23	0.27	0.4	0.25	0.71	-0.19	0.67	0.21	0.02	0.89	0.75		0.48	0.39	0.76	0.34	0.19	0.87	0.34	0.85	-0.46	1.02	-0.36	-0.14	0.54	0.7		-0.01	0.34	0.17	0.11	-0.08	0.47	0.09	0.14	-0.27	0.35	-0.57	-0.16
46	1	1	35.5	4.87	3	3		-0.23	-0.34	-0.02	-0.12	0.02	-0.28	-0.25	-0.31	-0.17	-0.01	-0.1	0.1	0.18	-0.13		-0.26	-0.01	0.25	-0.24	-0.22	-0.24	-0.29	-0.22	0.08	-0.2	0.14	-0.09	-0.46	-0.33		-0.03	0.33	0.27	-0.12	-0.24	0.04	-0.04	0.09	0.25	-0.19	0.24	-0.19
47	1	1	28.1	1.75	3	3		-0.12	-0.07	-0.03	-0.22	-0.06	0.03	-0.21	-0.07	-0.11	-0.06	-0.09	-0.17	-0.07	-0.11		0.09	0.18	-0.15	0	-0.22	-0.04	0.03	0.08	0.19	0.21	-0.16	-0.1	-0.08	-0.19		0.21	0.25	-0.12	0.22	-0.16	-0.07	0.24	0.15	0.3	0.27	-0.07	0.07
62	1	1	29.5	2.54	3	3		0.07	0.14	0.1	0.45	-0.11	0.41	0	0.05	0.29	0.13	0.51	0	-0.5	0.39		-0.01	-0.22	0.08	0.25	0.22	0.21	0.03	0.11	-0.02	-0.2	0.27	0.17	0.49	0.1		-0.08	-0.36	-0.02	-0.2	0.33	-0.2	0.03	0.06	-0.31	-0.33	-0.24	0.17
50	1	1	24.6	1.21	3	3		0.59	0.41	0.7	0.31	0.31	0.53	0.48	0.67	0.16	0.87	0.38	0.55	0.86	0.64		0.32	0.88	0.14	0.68	0.67	0.4	0.44	0.11	0.37	-0.71	0.49	0.16	0.69	0.5		-0.27	0.47	-0.56	0.37	0.36	-0.13	-0.04	-0.56	0.21	-1.58	0.11	-0.39
46	1	1	30.4	6.74	3	3		-0.16	0.25	-0.5	-0.12	0.29	-0.18	-0.1	-0.09	-0.64	0.23	-0.19	0.06	0.25	-0.04		0.38	0.52	-0.22	0.35	0.66	-0.08	0.53	0.27	0.69	0.02	0.44	0.42	0.03	0.09		0.54	0.27	0.28	0.47	0.37	0.1	0.63	0.36	1.33	-0.21	0.63	0.36
46	1	1	31.4	3.08	3	3		0.24	-0.09	-0.31	-0.27	-0.23	-0.05	0.04	0.34	0.41	0.76	0.03	-0.05	0.05	0.13		0.03	0.18	0.07	0.28	0.35	0.15	0.24	-0.27	0.07	-0.33	0	0.11	0.4	0.07		-0.21	0.27	0.38	0.55	0.58	0.2	0.2	-0.61	-0.34	-1.09	-0.03	0.16
48	1	0	37.7	2.29	3	3		-0.07	-0.25	-0.3	-0.27	-0.34	-0.19	-0.02	-0.16	-0.03	-0.19	-0.11	-0.2	-0.08	-0.08		-0.6	-0.8	-0.62	-0.67	-0.53	-0.72	-0.53	-0.68	-0.43	-0.68	-0.13	-0.04	-0.52	-0.79		-0.53	-0.55	-0.32	-0.4	-0.19	-0.53	-0.51	-0.52	-0.4	-0.49	-0.02	0.16
47	1	1	25.6	3.3	3	3		-0.05	0.11	-0.15	-0.18	0.13	-0.02	-0.02	-0.12	-0.05	-0.16	-0.19	-0.32	-0.03	-0.11		0.14	0.14	-0.06	0.19	0.29	0.11	0.19	0.09	0.25	0.09	0.22	0.11	0.3	0.08		0.19	0.03	0.09	0.37	0.16	0.13	0.21	0.21	0.3	0.25	0.41	0.43
48	1	1	29.9	3.98	3	3		0.4	0.32	0.59	0.39	0.56	0.04	0.35	0.48	0.15	0.81	0.08	0.44	0.45	0.44		0.33	0.36	-0.16	0.48	0.68	0.45	0.48	0.27	0.25	0.3	0.25	0.41	0.31	0.33		-0.07	0.04	-0.75	0.09	0.12	0.41	0.13	-0.21	0.1	-0.51	0.17	-0.03
48	1	0	24.2	8.42	3	3		0.23	0.51	0.23	0.68	0.47	0.58	0.3	0.16	0.48	0.1	0.56	0.39	0.2	0.34		0.08	0.46	0.12	0.22	0.31	0.31	0.17	-0.16	0.34	-0.24	0.63	0.3	0.42	0.32		-0.15	-0.05	-0.11	-0.46	-0.16	-0.27	-0.13	-0.32	-0.14	-0.34	0.07	-0.09
53	1	1	30.5	4.33	3	3		0.12	0.06	0.28	0.07	0.41	-0.22	0.04	0.22	-0.08	-0.08	0.1	0.19	0.49	0.18		0.59	0.64	0.35	0.64	0.57	0.44	0.63	0.5	0.82	0.45	0.61	0.78	0.2	0.47		0.47	0.58	0.07	0.57	0.16	0.66	0.59	0.28	0.9	0.53	0.51	0.59
43	2	0	24.5	8.8	3	3		-0.34	-0.46	0.2	-0.31	-0.11	-0.17	-0.34	-0.29	-0.47	-0.24	-0.36	-0.3	-0.18	-0.16		-0.08	0.1	-0.11	0.17	0.25	-0.27	0.15	-0.16	0.25	-0.27	0.06	0.35	0	-0.19		0.26	0.56	-0.31	0.48	0.36	-0.1	0.49	0.13	0.72	-0.03	0.42	0.65
52	2	0	20.7	7.5	3	3		0.01	-0.15	-0.06	-0.17	0.12	0.42	0.04	0.01	-0.19	-0.4	-0.18	0.01	0.01	0.09		-0.1	-0.13	-0.32	0.08	0.09	-0.19	-0.05	-0.22	0.22	-0.35	0.38	0.08	-0.01	-0.12		-0.11	0.02	-0.26	0.25	-0.03	-0.61	-0.09	-0.23	0.41	0.05	0.56	0.07
42	2	0	29.2	6.48	3	3		0.03	-0.12	0.12	0.28	-0.28	0.29	-0.31	0.3	-0.69	0.35	-0.22	-0.27	0.34	0.33		-0.28	-0.25	-0.79	-0.41	-0.21	-0.43	-0.16	-0.38	-0.25	-0.64	-0.12	-0.2	-0.06	-0.41		-0.31	-0.13	-0.91	-0.69	0.07	-0.72	0.15	-0.68	0.44	-0.99	0.1	0.07
32	2	0	22.6	4.63	3	3		0.38	0.23	0.82	0.02	0.05	0.77	0.2	0.58	0.28	1.26	-0.04	0	0.42	0.36		0.64	0.95	0.51	0.98	0.95	0.53	0.85	0.43	0.95	0.21	0.82	0.81	0.52	0.47		0.26	0.72	-0.31	0.96	0.9	-0.24	0.65	-0.15	0.67	-1.05	0.86	0.81
52	2	0	31.3	3.8	3	3		0.36	0.09	1.14	0.24	0.37	1.15	0.17	0.6	0.05	0.72	0.25	0.21	0.76	0.53		-0.23	0.05	-0.04	-0.43	0.15	0.15	-0.16	-0.23	-0.86	-0.04	-0.38	-0.15	0.12	0.11		-0.59	-0.04	-1.18	-0.67	-0.22	-1	-0.33	-0.83	-0.91	-0.76	-0.63	-0.36
36	2	1	26.2	6.06	3	3		0.13	-0.15	0.51	-0.08	-0.05	0.27	0.05	0.18	-0.15	-0.02	0.18	0.01	0.16	0.23		0.39	0.35	0.41	0.58	0.64	0.4	0.47	0.26	0.48	0.41	0.68	0.76	0.55	0.33		0.26	0.5	-0.1	0.66	0.69	0.13	0.42	0.08	0.63	0.43	0.5	0.75
40	2	1	18.5	2.77	3	3		0.23	0.19	0.67	0.14	0.16	0.17	0.32	0.24	0.28	0.29	0.17	0.22	0.08	0.29		0.09	0.04	0.18	-0.01	0.07	0.33	0.04	0.2	0.12	0.29	0.1	0.07	0.29	0		-0.14	-0.15	-0.49	-0.15	-0.09	0.16	-0.28	-0.04	-0.16	0	-0.07	-0.15
46	2	1	25.6	2.03	3	3		-0.14	-0.44	-0.44	-0.42	0.04	0.1	-0.1	-0.2	-0.03	-0.29	-0.04	-0.05	0.28	-0.04		-0.1	0.19	0.02	0.12	0.26	-0.3	0.01	-0.18	-0.3	-0.01	-0.27	-0.08	-0.05	-0.11		0.04	0.63	0.46	0.54	0.22	-0.4	0.11	0.02	-0.27	0.28	-0.23	-0.03
52	2	0	21.3	3.5	3	3		-0.12	-0.76	0.27	-0.31	-0.33	0.2	-0.22	0.04	-0.14	0.14	-0.34	-0.21	0.07	0.23		0.25	-0.01	0.5	0.04	-0.1	0.2	0.12	0.36	0.06	0.36	0.02	0.11	0.07	0.29		0.37	0.75	0.23	0.35	0.23	0	0.34	0.32	0.2	0.22	0.36	0.32
45	2	0	38.6	1.47	3	3		0.53	0.81	0.19	0.81	0.84	0.74	0.73	0.31	1.36	-0.02	1.35	0.9	0.37	0.15		-0.06	0.08	0.77	0.34	-0.1	0.08	-0.19	0.13	-0.4	0.55	0.23	-0.07	-0.04	0.1		-0.59	-0.73	0.58	-0.47	-0.94	-0.66	-0.92	-0.18	-1.76	0.57	-1.12	-0.97
51	2	1	31	5.91	3	3		1.09	1.13	0.52	0.88	0.8	0.78	0.94	1.19	0.58	0.22	0.23	0.21	0.65	0.24		-0.06	-0.04	0.07	-0.03	0.21	-0.1	-0.04	-0.05	-0.31	-0.43	-0.26	-0.08	0.05	-0.14		-1.15	-1.17	-0.45	-0.91	-0.59	-0.88	-0.98	-1.24	-0.89	-0.65	-0.49	-0.29
[truncated: 91 more columns]
